# Supplementary material for: Interplay of IGF1R and estrogen signaling regulates hematopoietic stem and progenitor cells
Source: PubMed Central journal article supplement — bioRxiv. 2024 Mar 21:2024.03.20.585808. Preprint. [Version 1] doi: 10.1101/2024.03.20.585808 (PMC10983897; doi:10.1101/2024.03.20.585808), 2024-03-21
Supplement: media-1.pdf [file media-1.pdf]

| Genotype                         | WBCs<br>( $\times 10^3$ cells/ml) | RBCs<br>( $\times 10^6$ cells/ml) | Platelet counts<br>( $\times 10^3$ /ml) |
|----------------------------------|-----------------------------------|-----------------------------------|-----------------------------------------|
| <i>VavCre</i>                    | 8.28 $\pm$ 1.37                   | 8.28 $\pm$ 0.19                   | 1081 $\pm$ 22                           |
| <i>VavCre;Igf1<sup>r/L</sup></i> | 6.16 $\pm$ 0.91                   | 7.92 $\pm$ 0.69                   | 955 $\pm$ 130                           |
| statistic                        | N=4, p=0.25                       | N=4, p=0.64                       | N=4, p=0.38                             |

WBCs, white blood cells; RBCs, red blood cells.

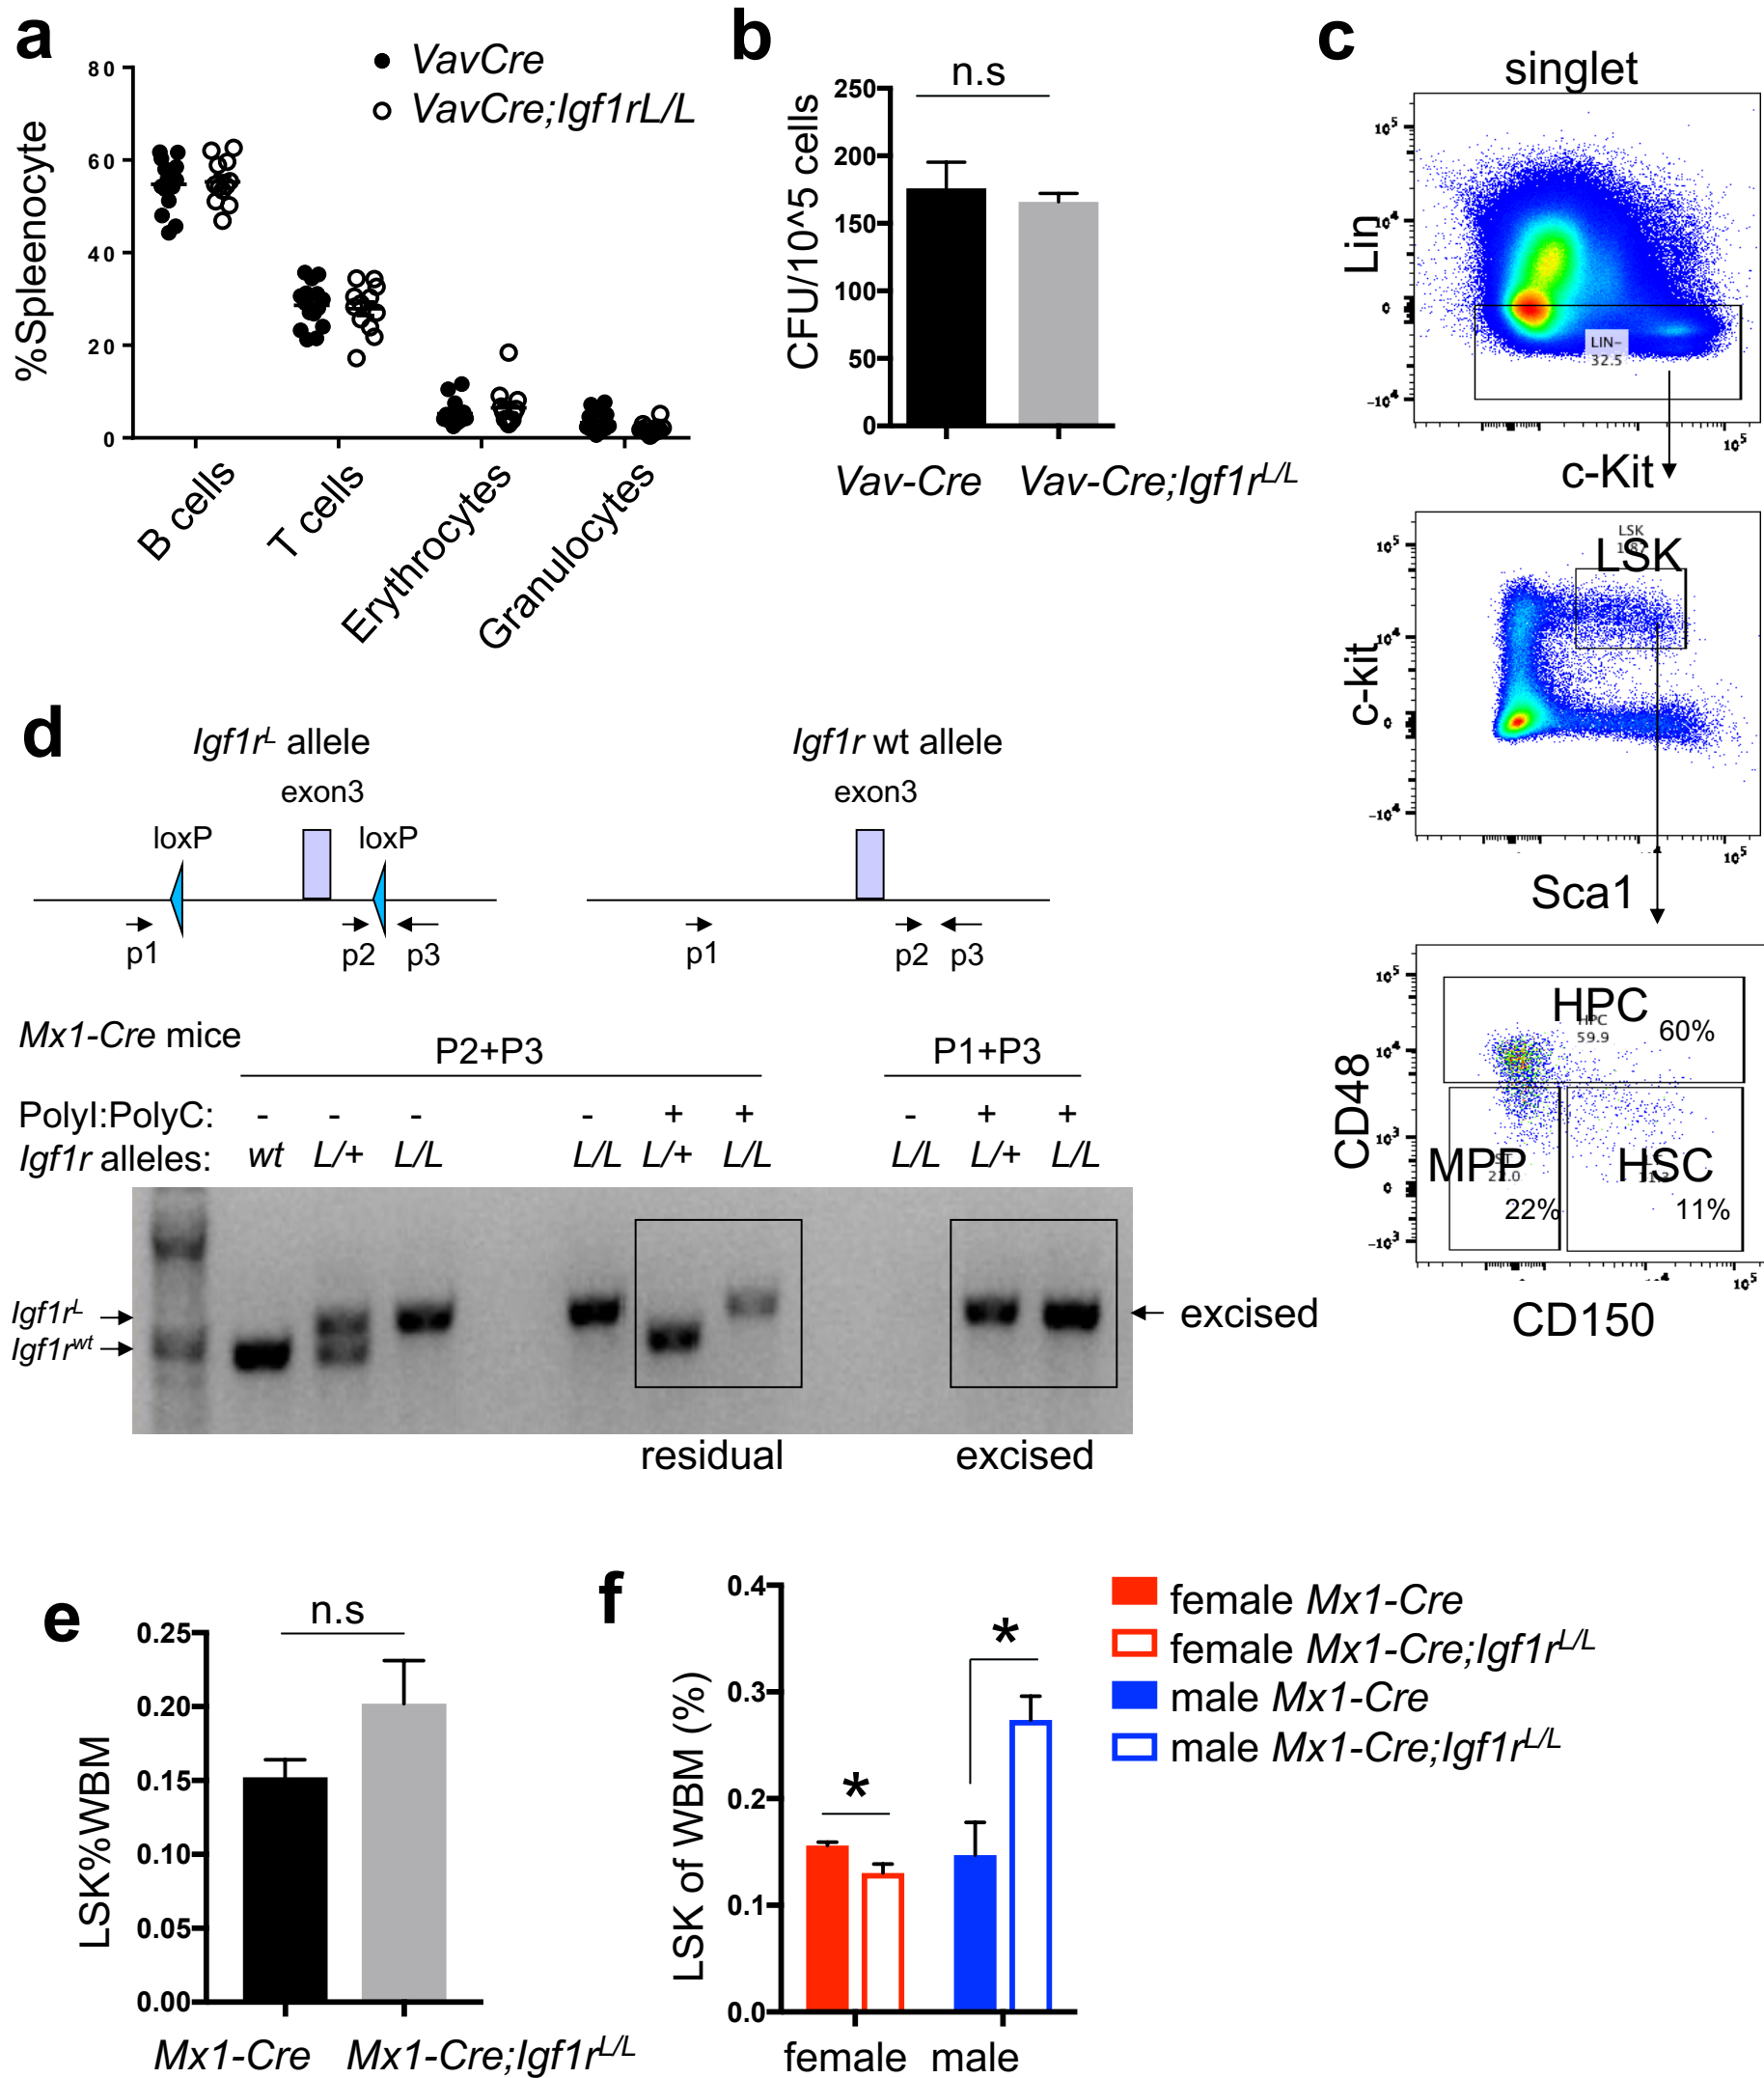

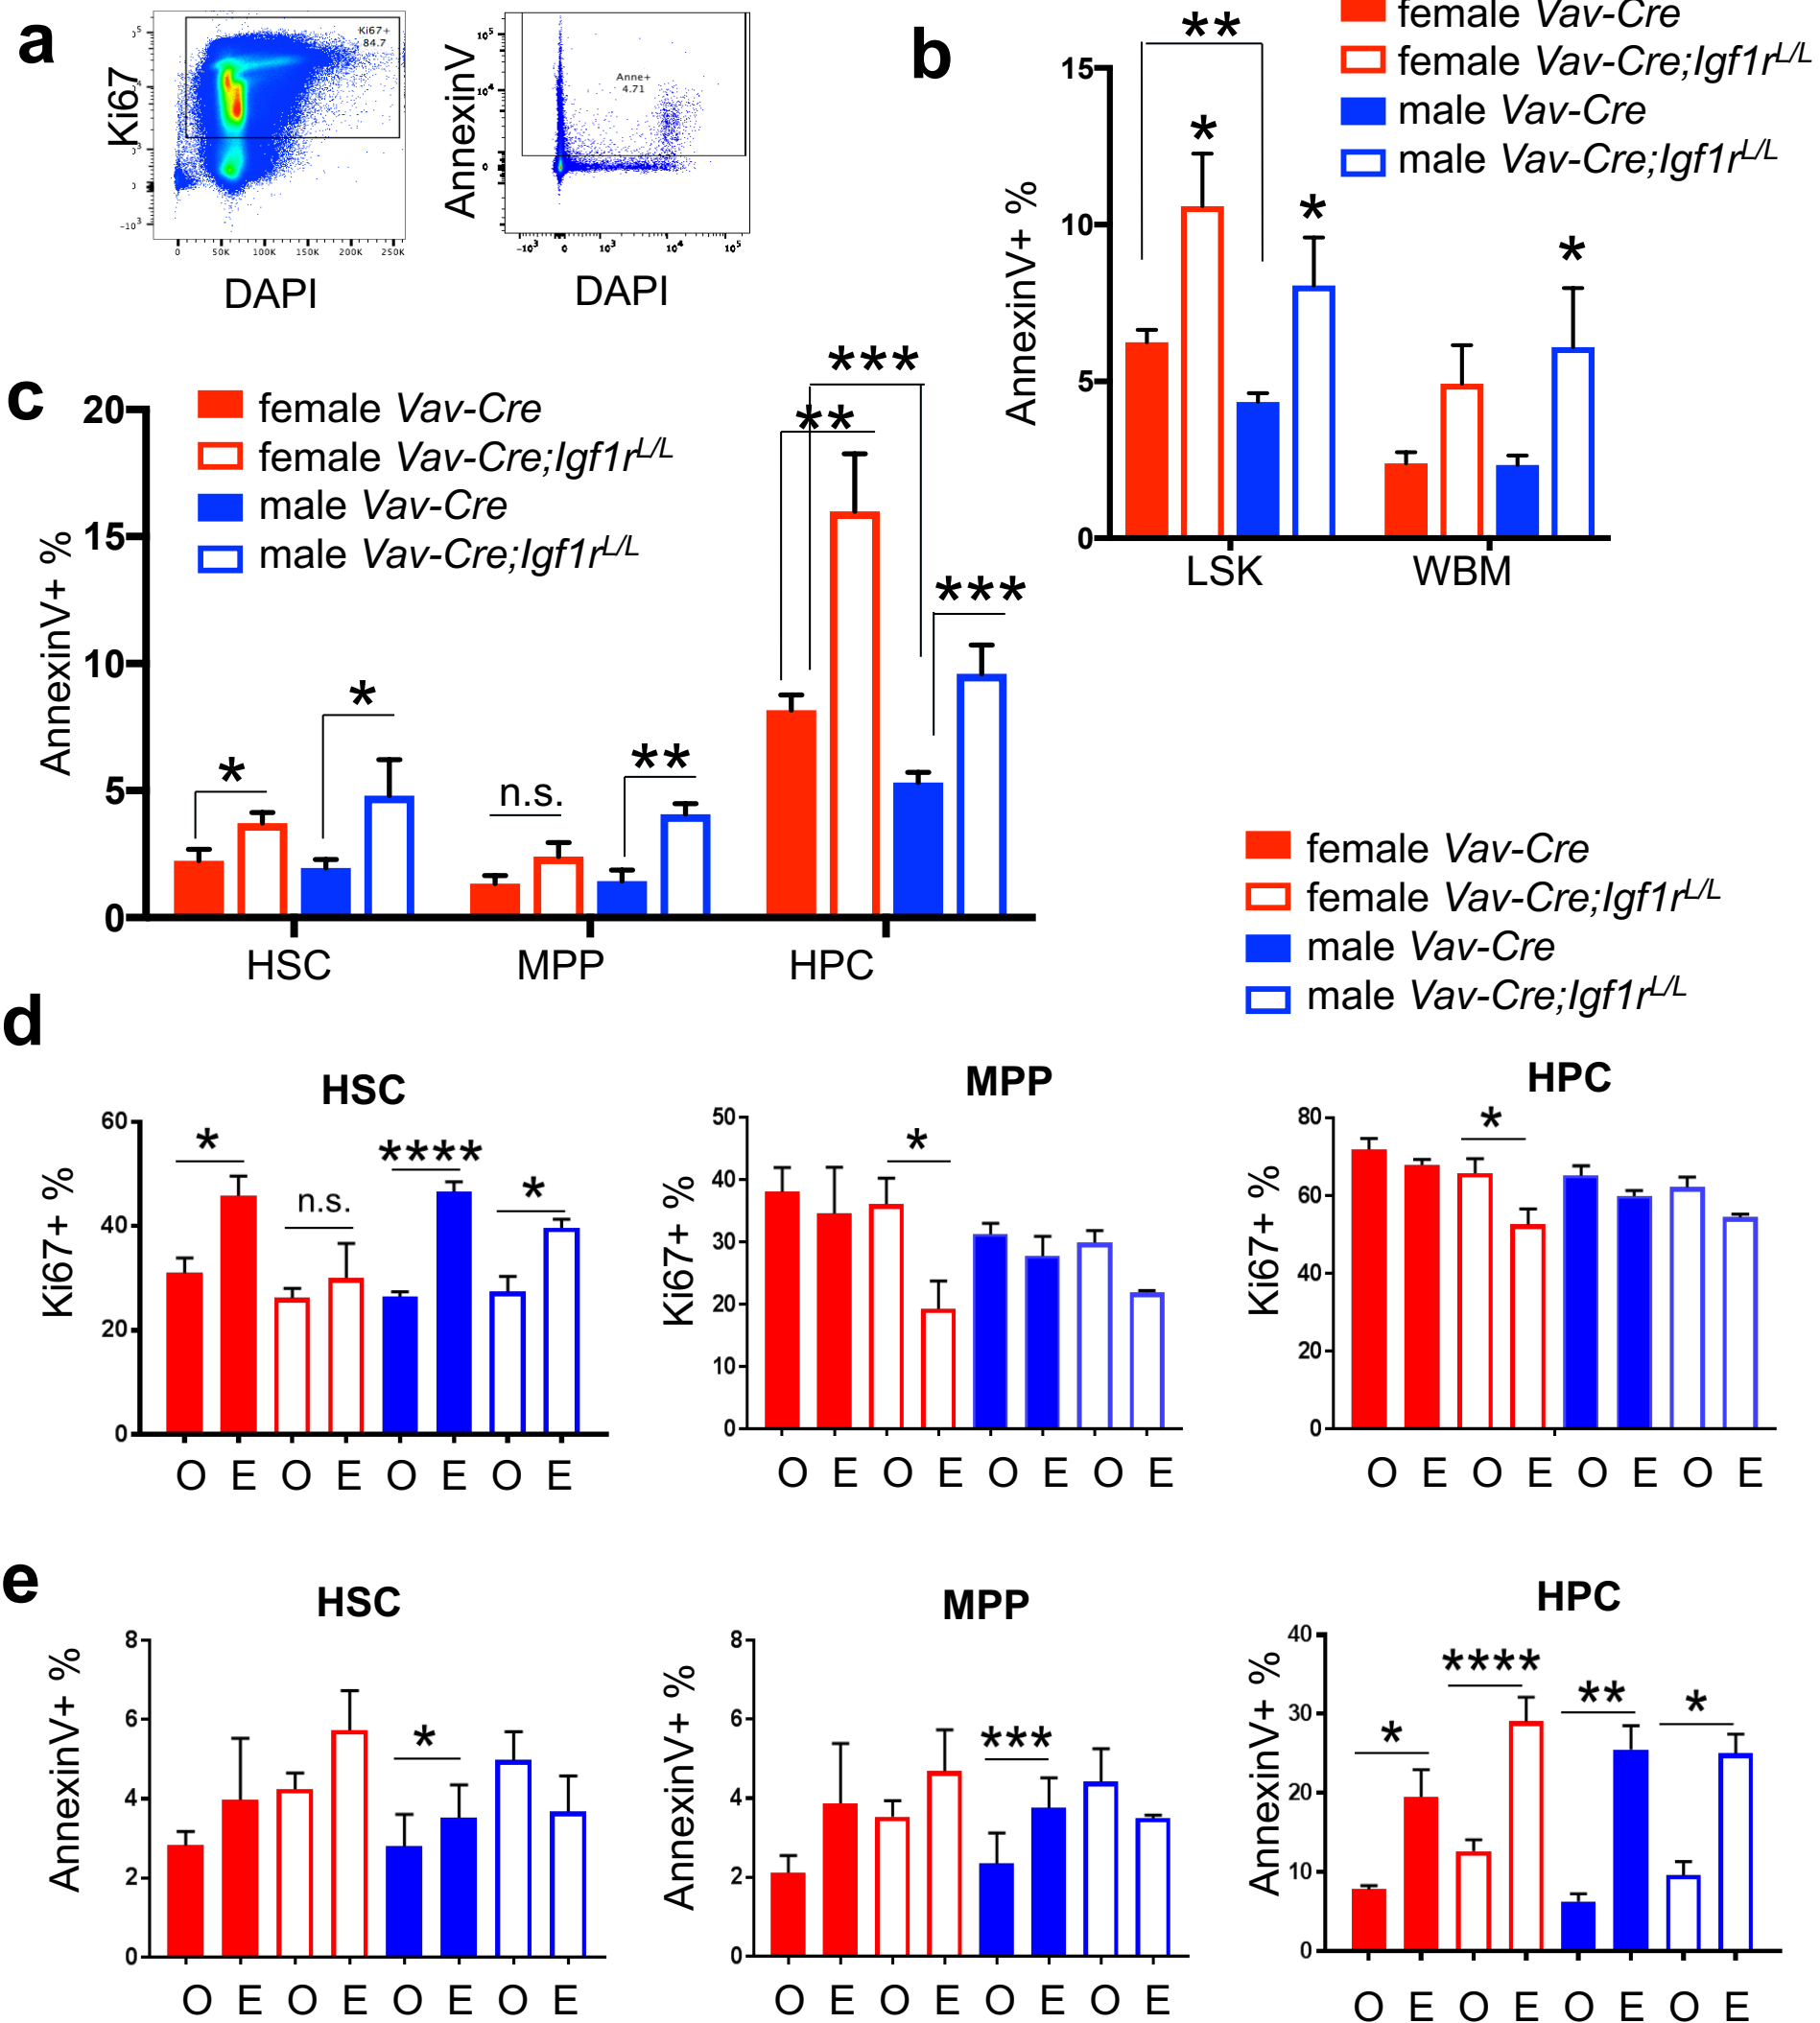

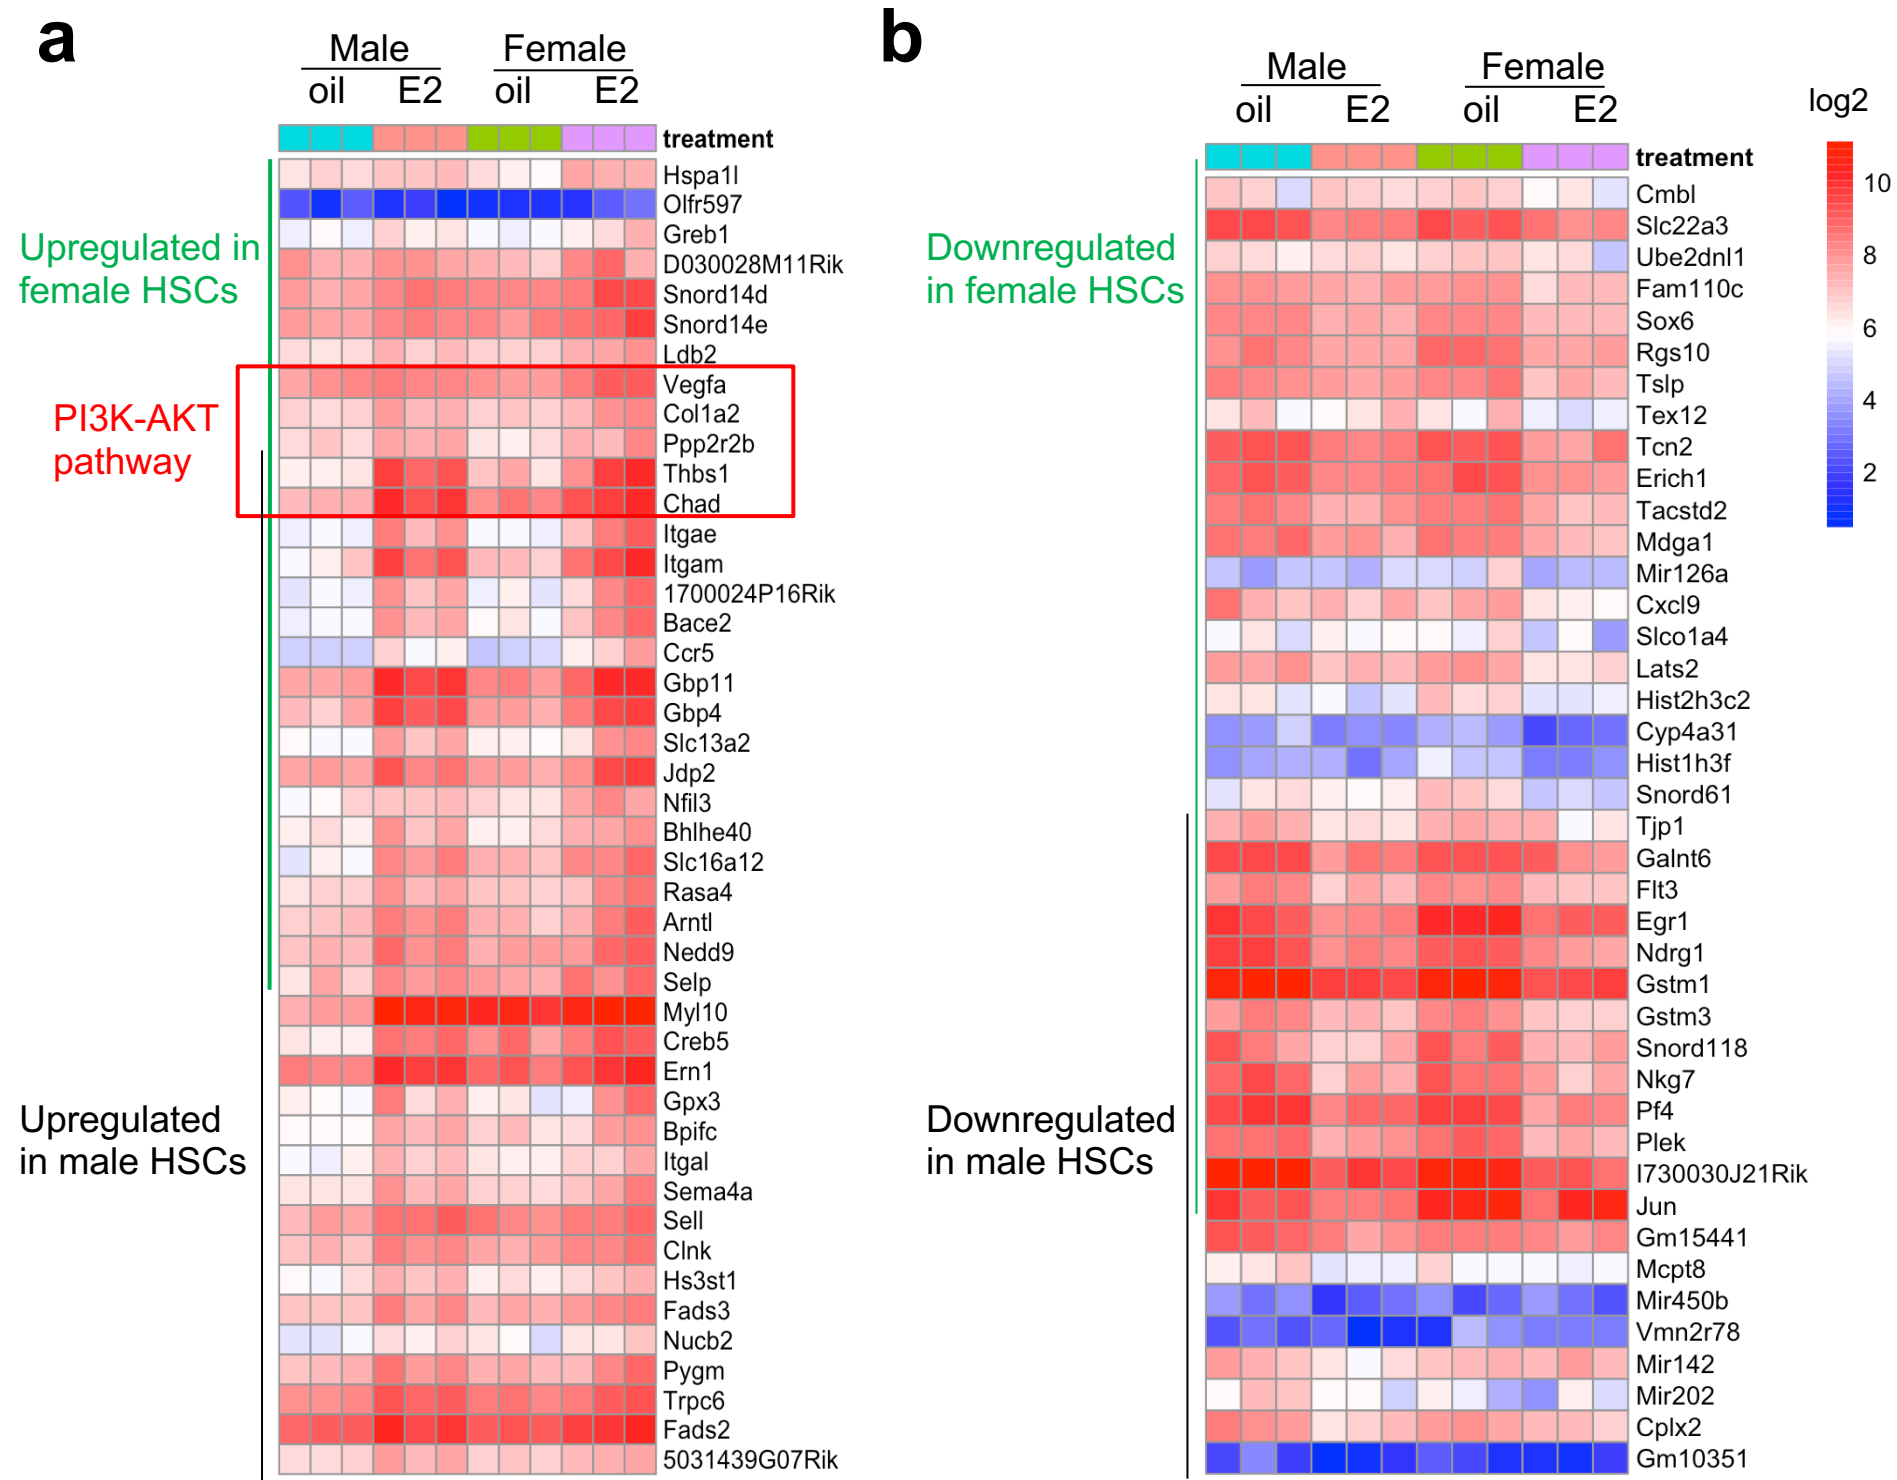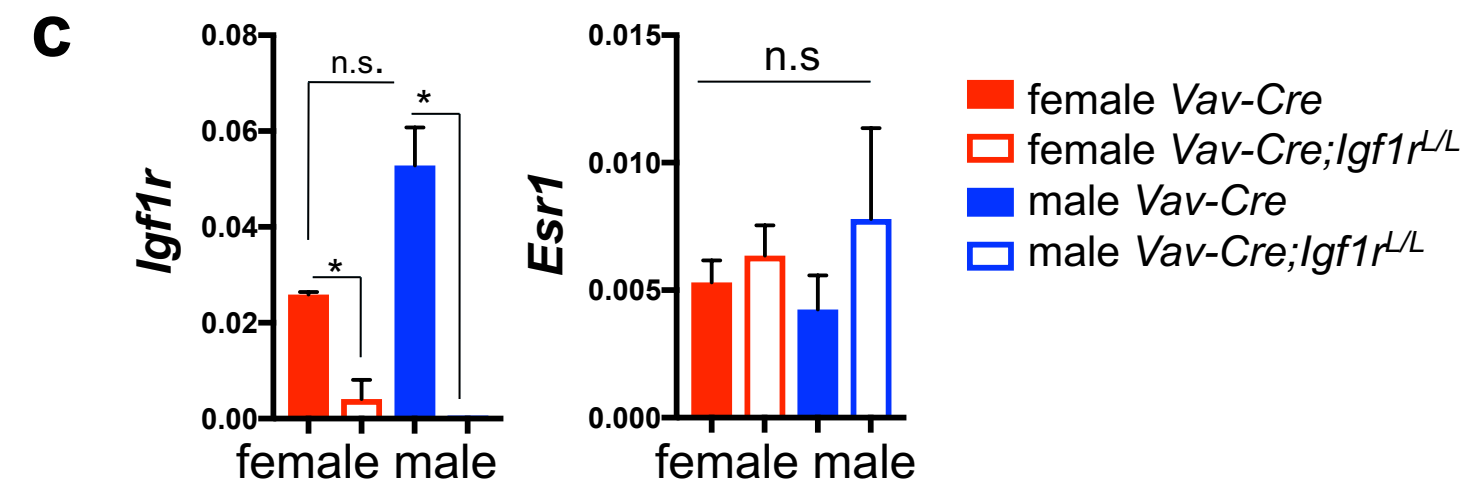

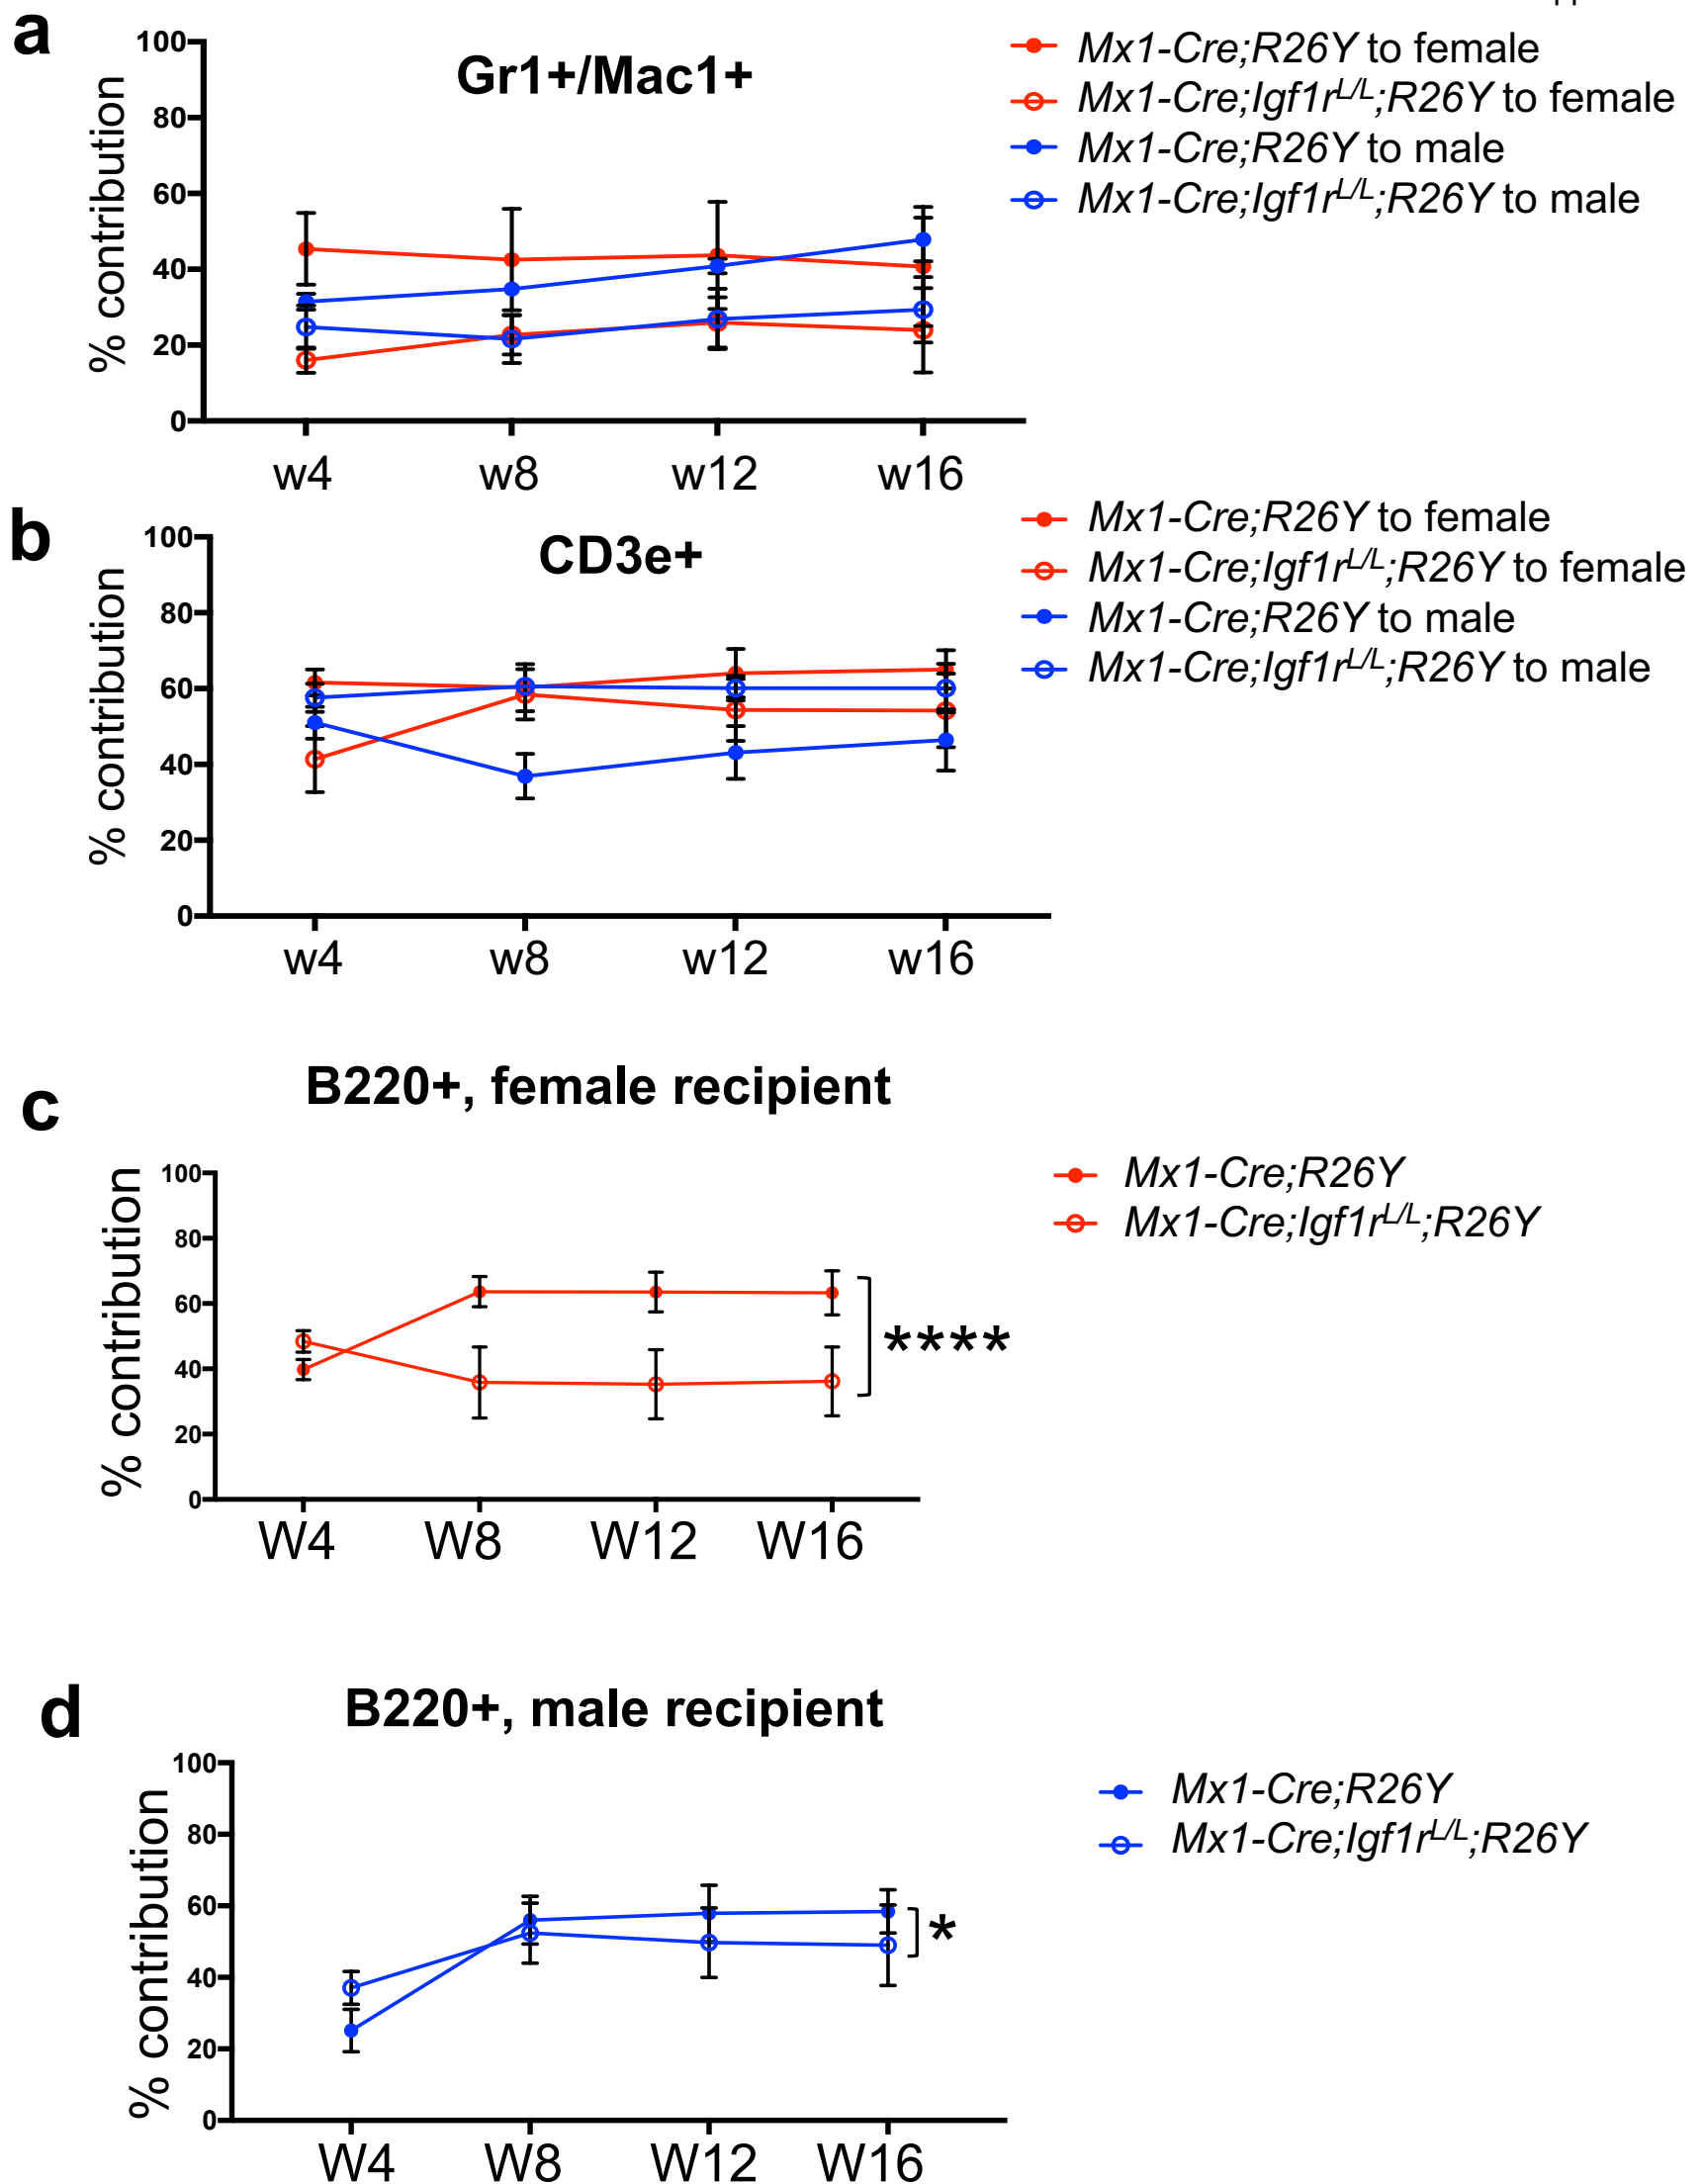

**a**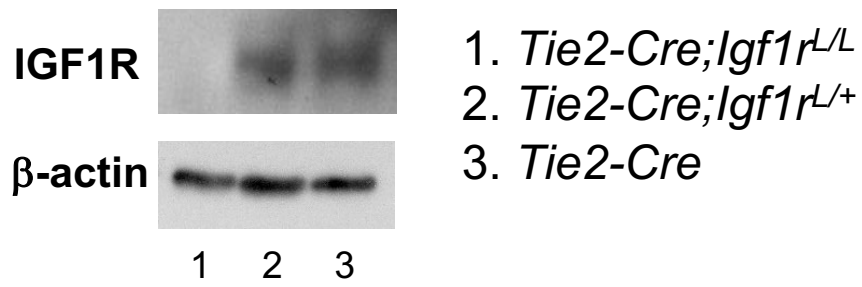**b**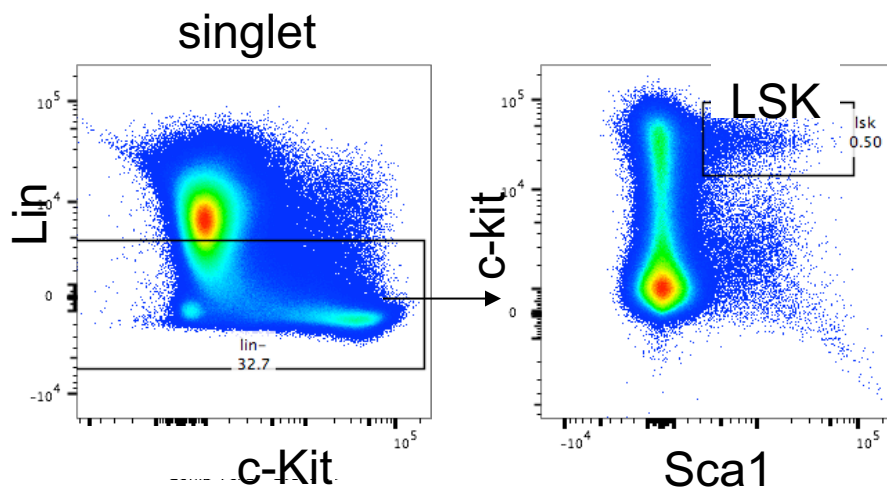**c**

| Genotype               | <i>Tie2-Cre; Igf1r<sup>L/L</sup></i> | <i>Tie2-Cre; Igf1r<sup>L/+</sup></i> | <i>Tie2-Cre; Igf1r<sup>+/+</sup></i> |
|------------------------|--------------------------------------|--------------------------------------|--------------------------------------|
| Live pups observed (%) | 38 (22%)                             | 91 (52%)                             | 47 (27%)                             |
| Expected %             | 25%                                  | 50%                                  | 25%                                  |

**a**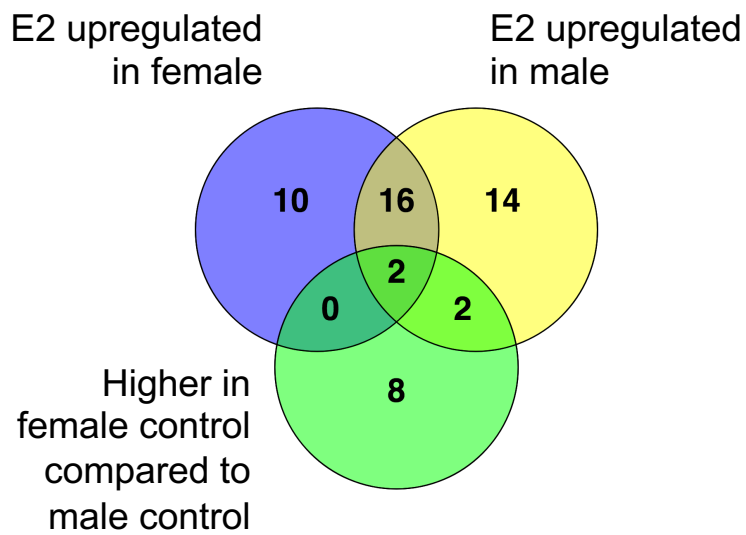**b**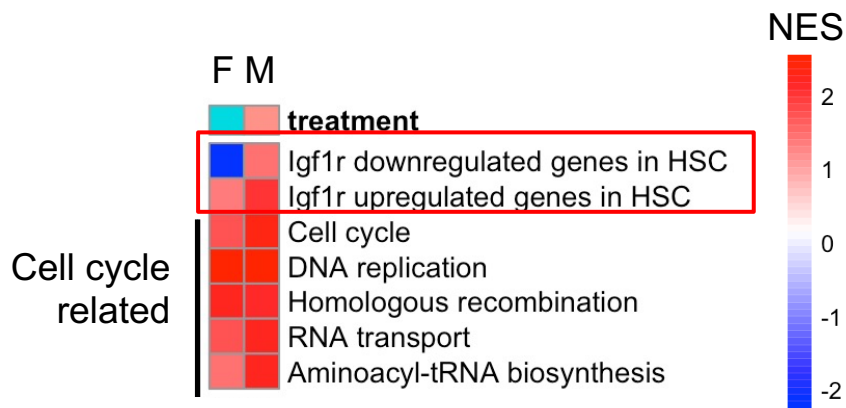**c**

igf1r downregulated genes in LT-HSCs

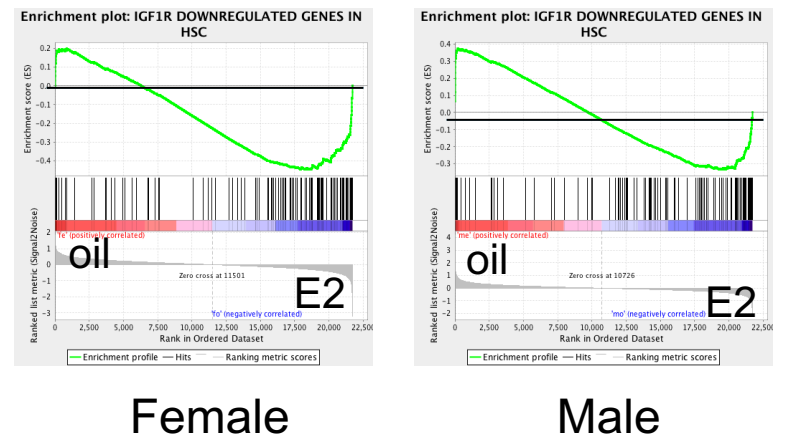

## Supplementary Figure Legends

### Supplementary Fig. 1. IGF1R signaling is largely dispensable for adult hematopoiesis.

(a) Percentages of different lineages of mature hematopoietic cells in the spleen (based on spleenocytes) were measured by flow cytometry (B220<sup>+</sup> B cells, CD3e<sup>+</sup> T cells, Ter119<sup>+</sup> erythrocytes, Gr1<sup>+</sup>/Mac1<sup>+</sup> granulocytes) between wild-type (WT) (*Vav-Cre*, n=14) and mutant (*Vav-Cre;Igf1r<sup>L/L</sup>*, n=12). (b) Colony forming units (CFU) of BM cells were measured. n=5 for both *Vav-Cre;Igf1r<sup>L/L</sup>* and *Vav-Cre* (WT) mice. (c) Representative FACS plots showing strategy to determine percentage of each population. (d) Schematic diagram and PCR results showing PCR strategy for detecting *loxP* sites floxing the *Igf1r* exon3 and Cre-mediated excision of this exon. (e) The LSK population in whole bone marrow (WBM) exhibited no significant difference between *Mx1-Cre* (WT) and *Mx1-Cre;Igf1r<sup>L/L</sup>* (n=7 and n=8, respectively) adult mice. (f) LSK population in the BM of female or male *Mx1-Cre;Igf1r<sup>L/L</sup>* mice compared to *Mx1-Cre* control mice. n=4 for both female *Mx1-Cre;Igf1r<sup>L/L</sup>* and *Mx1-Cre* mice, n=4 and n=3 for both male *Mx1-Cre;Igf1r<sup>L/L</sup>* and *Mx1-Cre* mice, respectively. Data represent mean  $\pm$  SEM. \*p<0.05, \*\*p<0.01, \*\*\*p<0.005, \*\*\*\*p<0.001, n.s.=not significant.

### Supplementary Fig. 2. Both IGF1R-loss and estrogen treatment induce apoptosis in HSPCs.

(a) Representative FACS plots showing strategy to determine percentages of Ki67<sup>+</sup> cycling cells and AnnexinV<sup>+</sup> apoptotic cells. (b) Percentages of AnnexinV<sup>+</sup> apoptotic cells were measured for both LSK and WBM populations. n $\geq$ 3. (c) Percentages of AnnexinV<sup>+</sup> apoptotic cells were measured for all HSPC subpopulations. n $\geq$ 3. (d-e) Percentages of Ki67<sup>+</sup> proliferating cells (d) and AnnexinV<sup>+</sup> apoptotic cells (e) in each indicated HSPC subpopulation from female or male *Vav-*



*Cre;Igf1r<sup>L/L</sup>* and/or *Vav-Cre* mice treated with oil (O) or  $\beta$ -estradiol (E).  $n \geq 3$ . Data represent mean  $\pm$  SEM. \* $p < 0.05$ , \*\* $p < 0.01$ , \*\*\* $p < 0.005$ , \*\*\*\* $p < 0.001$ , n.s.=not significant.

### **Supplementary Fig. 3. Molecular analysis of HSCs.**

(a-b) Genes significantly upregulated ( $\log_{2}FC > 1$ ,  $p < 0.05$ , a) or downregulated ( $\log_{2}FC < -1$ ,  $p < 0.05$ , b) by E2-treatment compared to oil-treatment in female or male HSCs respectively. Green line: genes significantly changed in female HSCs; black line: genes significantly changed in male HSCs. Red and blue indicate gene expression levels (from highest to lowest) from original microarray data. (c) qRT-PCR analysis showing relative expression levels of *Igf1r* and *Esr1* in female and male BM HSCs with the indicated genotypes, both normalized to *Gapdh*.  $n \geq 3$ . Data represent mean  $\pm$  SEM. \* $p < 0.05$ , \*\* $p < 0.01$ , \*\*\* $p < 0.005$ , \*\*\*\* $p < 0.001$ , n.s.=not significant.

### **Supplementary Fig. 4. Engraftment of the same donor cells to female or male recipients.**

(a and b) Donor contribution (as percentage of CD45.2<sup>+</sup>YFP<sup>+</sup> cells) over time in Gr1<sup>+</sup>/Mac1<sup>+</sup> granulocyte (a) and CD3e<sup>+</sup> T cells (b) lineages was measured in both female and male recipient mice. (c-d) Donor contribution (as percentage of CD45.2<sup>+</sup>YFP<sup>+</sup> cells) in peripheral blood in the B220<sup>+</sup> B cell lineage was measured over time in female (c) versus male (d) recipient mice.  $n \geq 3$  for each data point. Data represent mean  $\pm$  SEM. Pearson's correlation coefficient analysis was used to calculate the *P* values for the whole trend. \* $p < 0.05$ , \*\*\*\* $p < 0.001$ , n.s.=not significant.

### **Supplementary Fig. 5. Analysis of IGF1R-loss in fetal hematopoiesis.**

(a) Western blot showing loss of IGF1R protein in the fetal liver (FL) hematopoietic cell- derived colonies from the *Tie2-Cre* model. (b) Representative FACS plots showing strategy to determine

percentages of LSK population in the FL. (c) The expected Mendelian ratio and observed ratio of mice with the indicated genotype after birth.

**Supplementary Fig. 6. Additional molecular analysis of HSCs.**

(a) Venn diagram for E2 co-regulated genes as well as genes differentially expressed in male and female HSCs (all comparison  $\log_{2}FC > 1$  or  $< -1$ ,  $p < 0.05$ ). Left panel: co-upregulated genes and genes higher in female HSCs; Right panel: co-downregulated genes and genes higher in male HSCs. (b) Representative gene sets significantly regulated ( $NES > 1$  or  $< -1$ ,  $FDR < 0.15$ ) in both male and female HSCs after E2 treatment. Red and blue indicate gene sets significantly up- or down-regulated, respectively, in HSCs from E2-treated mice. The color scale represents their normalized enrichment score (NES). (c) Gene set enrichment analysis of *Igf1r* negatively correlated genes in LT-HSCs in the E2 regulated genes in female (left panel) or male (right panel) HSCs.
